# Supplementary material for: Description and evaluation of the new UM–UKCA (vn11.0) Double Extended Stratospheric–Tropospheric (DEST vn1.0) scheme for comprehensive modelling of halogen chemistry in the stratosphere
Source: Copernicus journal article supplement (doi:10.5194/gmd-16-6187-2023), 2023-11-02
Supplement: Supplementary file 1 [file gmd-16-6187-2023-supplement.pdf]

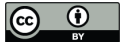

*Supplement of*

**Description and evaluation of the new UM–UKCA (vn11.0) Double Extended Stratospheric–Tropospheric (DEST vn1.0) scheme for comprehensive modelling of halogen chemistry in the stratosphere**

**Ewa M. Bednarz et al.**

*Correspondence to:* Ewa M. Bednarz ([ewa.bednarz@noaa.gov](mailto:ewa.bednarz@noaa.gov))

The copyright of individual parts of the supplement might differ from the article licence.

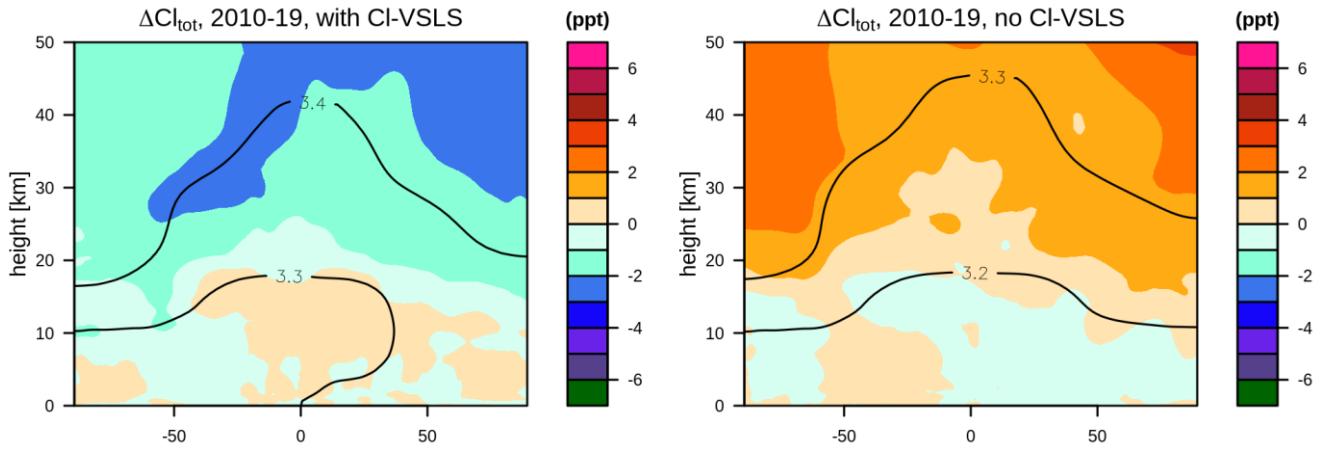

**Figure S1. Contours: 2010-2019 mean of total chlorine levels [ppb] in (left) the transient free-running DEST simulations discussed in Section 4.3 and (right) analogous simulations without CI-VSLS (Bednarz et al. 2022). Shading shows the corresponding total chlorine differences [ppt] between simulations carried out using the earlier DEST version containing the two problems discussed in Section 4.1 and simulations carried out using the final DEST scheme.**

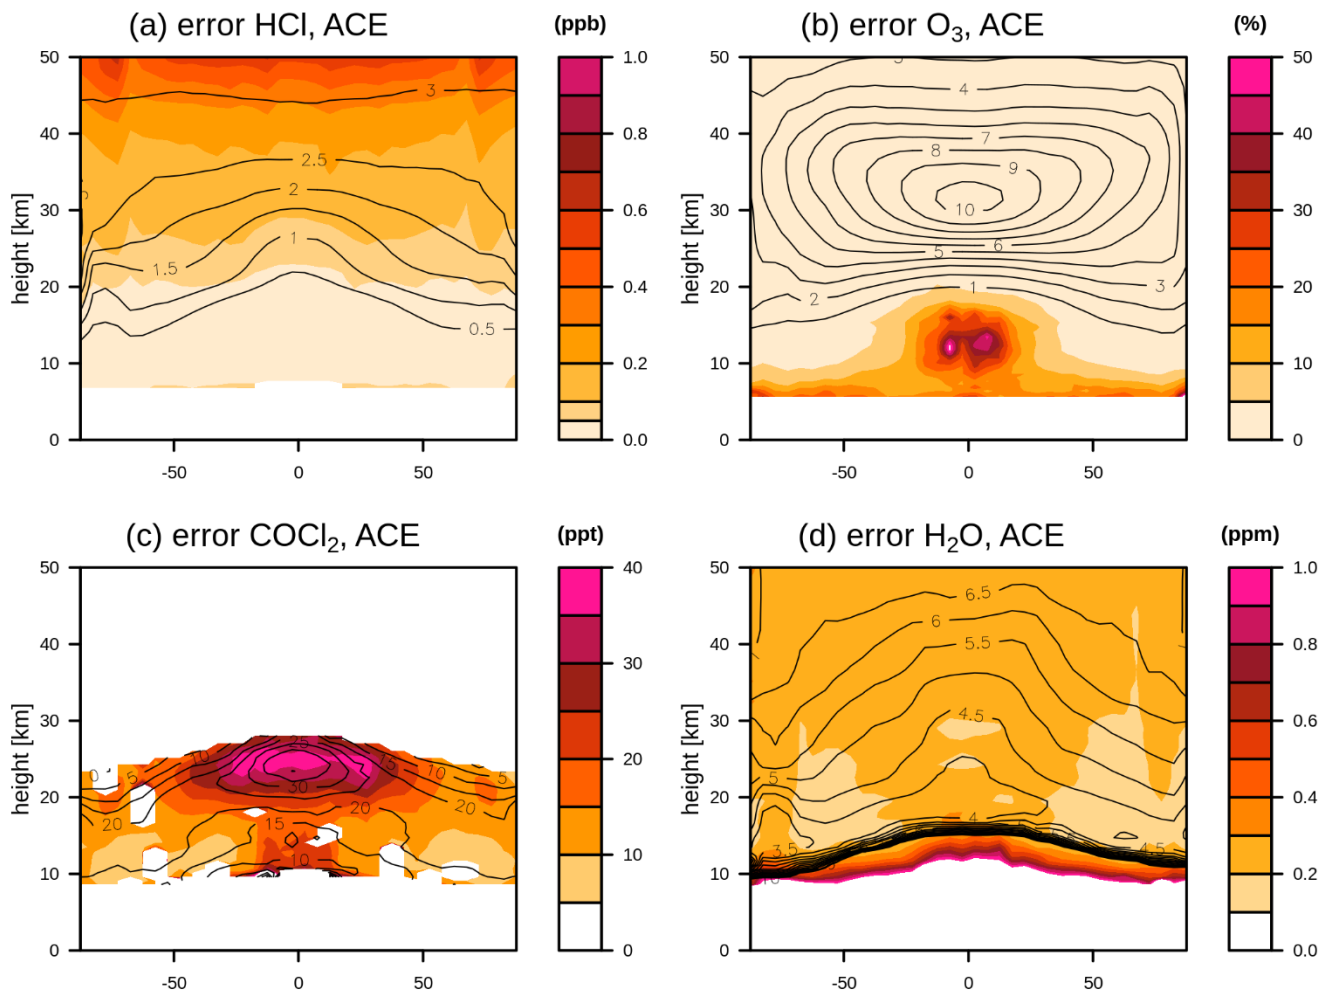

**Figure S2. Shading:** Error in the 2005-2019 mean of ACE-FTS v3.5-3.6 (a) HCl [ppb], (b) O<sub>3</sub> [%], (c) COCl<sub>2</sub> [ppt] and (d) H<sub>2</sub>O [ppm]. Contours show the respective climatologies for reference.
